# Supplementary material
Source: HighWire-hosted journal article supplement (http://www.qdcxjkg.com/highwire/filestream/113445/field_highwire_adjunct_files/0/00255-2012_Disclosures.pdf)
Supplement: 00255-2012_Disclosures.pdf [file 00255-2012_Disclosures.pdf]

R.H. Gilman has received funds from NIH and Gates Foundation.

R.A. Wise has been a paid consultant to AstraZeneca, BIPI, GSK, Merck, Novartis, Pfizer, Sunovion. He has received research funds from GSK, BIPI, and Forest Labs.
